# Supplementary material
Source: publisher figshare collection journal article supplement (https://frontiersin.figshare.com/ndownloader/files/24755006)
Supplement: Supplementary file 1 [file 24755006]

Supplementary Material

**Species, Spatial-Temporal Distribution, and Contamination Assessment of Trace Metals in Typical Mariculture Area of North China**

**Dawei Pan1,2,3,4*, Xiaoyan Ding1,4, Haitao Han1,2, Shenghui Zhang1,2, Chenchen Wang1,2**

1CAS Key Laboratory of Coastal Environmental Processes and Ecological Remediation, Yantai Institute of Coastal Zone Research, Chinese Academy of Sciences, Yantai 264003, P.R. China

2Shandong Key Laboratory of Coastal Environmental Processes, Research Center for Coastal Environment Engineering Technology of Shandong Province, Yantai Institute of Coastal Zone Research, Chinese Academy of Sciences, Yantai 264003, P.R. China

3Center for Ocean Mega-Science, Chinese Academy of Sciences, 7 Nanhai Road, Qingdao, 266071, P.R. China

4University of Chinese Academy of Sciences, Beijing 100049, P.R. China

**Figures**


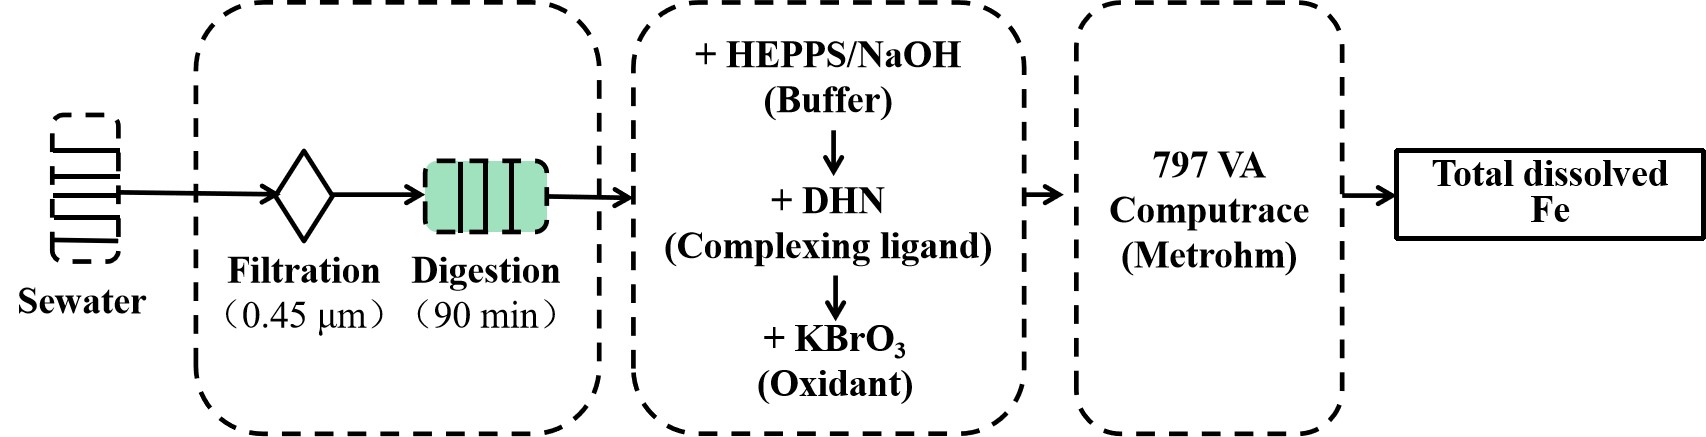


**Fig. S1.** Diagram showing the analysis processes of total dissolved Fe.

**Tables**

**Table S1.** Location of sampling stations in Sishili Bay.

| **Station** | **Latitude** | **Longitude** |
| --- | --- | --- |
| S1 | 37°32'38.40"N | 121°24'0.00"E |
| S2 | 37°28'44.40"N | 121°28'40.80"E |
| S3 | 37°26'49.44"N | 121°33'14.82"E |
| S4 | 37°34'4.80"N | 121°25'37.20"E |
| S5 | 37°31'8.40"N | 121°31'4.80"E |
| S6 | 37°29'20.40"N | 121°35'49.20"E |
| S7 | 37°35'45.60"N | 121°27'25.20"E |
| S8 | 37°33'28.80"N | 121°33'10.80"E |
| S9 | 37°31'37.20"N | 121°38'9.60"E |
| S10 | 37°38'10.14"N | 121°29'44.37"E |
| S11 | 37°35'43.80"N | 121°35'3.03"E |
| S12 | 37°33'37.87"N | 121°40'27.85"E |

**Table S2. Summary of trace metal concentrations in different species and physicochemical parameters in surface seawater of Sishili Bay.**

| **Concentration (μg/L)** |  | **Mar.** | **May** | **July** | **Sep.** | **Nov.** | **Annual average values** |
| --- | --- | --- | --- | --- | --- | --- | --- |
| dissolved reactive Cu | Range | 1.48 - 5.55 | 1.13 - 2.16 | 1.14 - 2.15 | 1.12 - 3.03 | 1.05 - 2.25 | 1.05 - 5.55 |
|  | Mean **±** Std | 2.57 **±** 1.09 | 1.71 **±** 0.27 | 1.84 **±** 0.32 | 1.67 **±** 0.49 | 1.70 **±** 0.37 | 1.90 **±** 0.66 |
| dissolved inert Cu | Range | 0.36 - 2.53 | 0.60 - 1.80 | 0.22 - 2.94 | 0.63 - 2.60 | 0.46 - 1.42 | 0.22 - 2.94 |
|  | Mean **±** Std | 0.98 **±** 0.66 | 1.10 **±** 0.43 | 0.89 **±** 0.72 | 1.28 **±** 0.64 | 0.91 **±** 0.31 | 1.03 **±** 0.57 |
| Total dissolved Cu | Range | 2.08 - 8.08 | 2.10 - 3.72 | 1.75 - 4.82 | 2.11 - 4.64 | 2.19 - 2.99 | 1.75 - 8.08 |
|  | Mean **±** Std | 3.54 **±** 1.63 | 2.81 **±** 0.51 | 2.74 **±** 0.78 | 2.95 **±** 0.86 | 2.61 **±** 0.26 | 2.93 **±** 0.96 |
| dissolved reactive Pb | Range | 0.79 - 1.59 | 0.59 - 1.19 | 0.15 - 0.93 | 0.51 - 0.85 | 0.48 - 0.92 | 0.15 - 1.59 |
|  | Mean **±** Std | 1.19 **±** 0.26 | 0.88 **±** 0.20 | 0.63 **±** 0.19 | 0.65 **±** 0.10 | 0.67 **±** 0.11 | 0.80 **±** 0.28 |
| dissolved inert Pb | Range | 0.02 - 0.64 | 0.22 - 1.56 | 0.12 - 0.89 | 0.31 - 0.69 | 0.40 - 0.77 | 0.02 - 1.56 |
|  | Mean **±** Std | 0.37 **±** 0.19 | 0.69 **±** 0.42 | 0.46 **±** 0.20 | 0.56 **±** 0.10 | 0.58 **±** 0.12 | 0.53 **±** 0.25 |
| Total dissolved Pb | Range | 1.29 - 1.97 | 1.08 - 2.75 | 0.43 - 1.59 | 1.08 - 1.34 | 1.10 - 1.45 | 0.43 - 2.75 |
|  | Mean **±** Std | 1.56 **±** 0.22 | 1.57 **±** 0.49 | 1.10 **±** 0.31 | 1.21 **±** 0.08 | 1.26 **±** 0.10 | 1.34 **±** 0.33 |
| dissolved reactive Cd | Range | 0.05 - 0.15 | 0.06 - 0.12 | 0.05 - 0.08 | 0.04 - 0.09 | 0.05 - 0.23 | 0.04 - 0.23 |
|  | Mean **±** Std | 0.09 **±** 0.03 | 0.09 **±** 0.02 | 0.07 **±** 0.01 | 0.06 **±** 0.01 | 0.09 **±** 0.05 | 0.08 **±** 0.03 |
| dissolved inert Cd | Range | 0.01 - 0.05 | 0.01 - 0.07 | 0.01 - 0.07 | 0.01 - 0.05 | 0.02 - 0.06 | 0.01 - 0.07 |
|  | Mean **±** Std | 0.02 **±** 0.01 | 0.03 **±** 0.02 | 0.03 **±** 0.02 | 0.03 **±** 0.01 | 0.04 **±** 0.01 | 0.03 **±** 0.02 |
| Total dissolved Cd | Range | 0.09 - 0.15 | 0.08 - 0.19 | 0.07 - 0.13 | 0.07 - 0.11 | 0.09 - 0.29 | 0.07 - 0.29 |
|  | Mean **±** Std | 0.11 **±** 0.02 | 0.12 **±** 0.03 | 0.09 **±** 0.02 | 0.09 **±** 0.02 | 0.12 **±** 0.06 | 0.11 **±** 0.03 |
| dissolved reactive Zn | Range | 5.68 - 20.14 | 5.21 - 17.41 | 1.48 - 5.27 | 1.62 - 4.98 | 2.21 - 7.23 | 1.62 - 20.14 |
|  | Mean **±** Std | 8.77 **±** 3.91 | 11.09 **±** 3.80 | 3.12 **±** 1.19 | 2.44 **±** 0.94 | 4.59 **±** 1.87 | 6.00 **±** 4.26 |
| dissolved inert Zn | Range | 2.48 - 14.39 | 1.66 - 16.96 | 0.75 - 11.55 | 0.43 - 4.29 | 0.54 - 2.50 | 0.43 - 16.96 |
|  | Mean **±** Std | 5.81 **±** 3.62 | 8.32 **±** 5.68 | 3.00 **±** 3.16 | 1.33 **±** 1.01 | 1.39 **±** 0.67 | 6.00 **±** 4.26 |
| Total dissolved Zn | Range | 10.15 - 23.73 | 7.35 - 30.28 | 2.58 - 15.31 | 2.66 - 9.27 | 3.80 - 9.81 | 2.58 - 30.28 |
|  | Mean **±** Std | 14.58 **±** 4.94 | 19.41 **±** 7.31 | 6.12 **±** 3.53 | 3.77 **±** 1.77 | 5.97 **±** 2.00 | 9.97 **±** 7.39 |
| Temperature (℃) | Range | 3.5 - 4.3 | 14.7 - 16.2 | 22.7 - 25.2 | 22.7 - 23.4 | 13.5 - 14.00 | 3.5 - 25.2 |
|  | Mean **±** Std | 3.9 ± 0.27 | 15.6 **±** 0.64 | 23.8 **±** 0.75 | 23.1 **±** 0.24 | 13.8 **±** 0.15 | 16 **±** 7.34 |
| pH | Range | 8.06 - 8.13 | 7.93 - 8.15 | 7.98 - 8.12 | 7.94 - 8.18 | 7.97 - 8.15 | 7.93 - 8.18 |
|  | Mean **±** Std | 8.09 **±** 0.02 | 8.07 **±** 0.06 | 8.07 **±** 0.05 | 8.10 **±** 0.06 | 8.10 **±** 0.04 | 8.09 **±** 0.08 |
| Salinity | Range | 31.18 - 32.4 | 31.24 - 31.64 | 28.89 - 31.60 | 31.33 - 31.64 | 30.79 - 31.46 | 28.89 - 32.4 |
|  | Mean **±** Std | 31.84 **±** 0.43 | 31.46 **±** 0.15 | 31.10 **±** 0.82 | 31.54 **±** 0.11 | 31.05 **±** 0.24 | 31.4 **±** 0.51 |
| DO (mg/L) | Range | 11.08 - 17.26 | 6.34 - 9.40 | 3.92 - 6.93 | 5.10 - 7.70 | 6.84 - 8.42 | 3.92 - 17.26 |
|  | Mean **±** Std | 13.36 **±** 1.64 | 8.50 **±** 0.81 | 6.36 **±** 0.79 | 6.30 **±** 0.75 | 7.93 **±** 0.39 | 8.49 **±** 2.78 |
| Conductivity (μS/cm) | Range | 49.39 - 50.89 | 47.89 - 48.44 | 45.22 - 48.41 | 48.01 - 48.46 | 47.18 - 48.21 | 45.22 - 50.89 |
|  | Mean **±** Std | 50.11 **±** 0.59 | 48.21 **±** 0.20 | 47.79 **±** 1.00 | 48.31 **±** 0.15 | 47.65 **±** 0.35 | 48.41 **±** 1.04 |
| Chlorophyll a (μg/L) | Range | 0.02 - 0.51 | 0.51 - 2.99 | 0.03 - 21.19 | 1.50 - 16.80 | 0.05 - 0.77 | 0.02 - 21.19 |
|  | Mean **±** Std | 0.14 **±** 0.17 | 1.86 **±** 0.84 | 3.14 **±** 5.90 | 4.90 **±** 5.01 | 0.25 **±** 0.21 | 2.06 **±** 3.82 |
